# Supplementary material for: Excited-state aromaticity reversals in norcorrole
Source: Royal Society of Chemistry journal article supplement (doi:10.1039/d4cp03198a), 2024-01-01
Supplement: d4cp03198a2.pdf [file d4cp03198a2.pdf]

## Electronic Supplementary Information

### Excited-State Aromaticity Reversals in Norcorrole

Peter B. Karadakov\* and Edward Cummings

Department of Chemistry, University of York, Heslington, York YO10 5DD, UK

E-mail: peter.karadakov@york.ac.uk

#### Table of Contents

|                                                                                                                                                         |           |
|---------------------------------------------------------------------------------------------------------------------------------------------------------|-----------|
| <b>1. Gaussian Cube Files with Isotropic Shielding Values .....</b>                                                                                     | <b>S2</b> |
| <b>2. Additional Computational Details .....</b>                                                                                                        | <b>S2</b> |
| <b>3. Comparison between the Vertical Excitation Energies Calculated with the TDA-<br/>B3LYP, TDA-PBE0 and TDA-<math>\omega</math>B97X Methods.....</b> | <b>S2</b> |
| <b>4. Natural Population Analysis Charges.....</b>                                                                                                      | <b>S3</b> |
| <b>5. Optimised Geometries and Other Computational Data.....</b>                                                                                        | <b>S3</b> |

## 1. Gaussian Cube Files with Isotropic Shielding Values

A zip archive of Gaussian cube files with isotropic shielding values for the  $T_1$  electronic states of NiNc and  $H_2Nc$  is available as a separate download.

These files can be examined with various programs, including GaussView (see <https://gaussian.com/gaussview6/>) and Visual Molecular Dynamics (VMD, see <https://www.ks.uiuc.edu/Research/vmd/>). Both URLs were checked on 9 September 2024.

## 2. Additional Computational Details

All B3LYP, UB3LYP, TDA-B3LYP, TDA-PBE0 and TDA- $\omega$ B97X calculations reported in this paper were carried out using the GAUSSIAN “SuperFine” integration grid. All geometry optimizations included Grimme’s D3 empirical dispersion corrections with Becke–Johnson damping, were carried out under the GAUSSIAN “VeryTight” convergence criteria, and were combined with analytical harmonic frequency calculations. All natural population analysis (NPA) calculations were carried out with the GAUSSIAN “Density(Current)” option.

Points making up the grids of isotropic magnetic shielding values and/or corresponding to NICS positions were specified in the GAUSSIAN input files as ghost atoms without basis functions (symbol “Bq”). To improve accuracy, the GAUSSIAN “CPHF(Separate)” option was used in all NMR calculations. Collecting all data for a grid requires running a number of separate GAUSSIAN calculations. To prepare the set of input files, use was made of a purpose-written program which is modified to include the GAUSSIAN route section, geometry and grid specification and for each molecule.

## 3. Comparison between the Vertical Excitation Energies Calculated with the TDA-B3LYP, TDA-PBE0 and TDA- $\omega$ B97X Methods

**Table S1** Vertical  $T_1 \leftarrow S_0$  and  $S_1 \leftarrow S_0$  excitation energies of NiNc and  $H_2Nc$  calculated using TDA-B3LYP, TDA-PBE0 and TDA- $\omega$ B97X in the def2-TZVP basis set, at the  $S_0$  B3LYP-D3(BJ)/def2-TZVP geometries (in eV).

| State/VEE                | TDA-B3LYP | TDA-PBE0 | TDA- $\omega$ B97X |
|--------------------------|-----------|----------|--------------------|
| NiNc $T_1$ ( $1^3A_2$ )  | 0.458     | 0.453    | 0.614              |
| NiNc $S_1$ ( $1^1A_2$ )  | 0.841     | 0.872    | 1.138              |
| $H_2Nc$ $T_1$ ( $1^3A$ ) | 0.607     | 0.605    | 0.852              |
| $H_2Nc$ $S_1$ ( $2^1A$ ) | 0.999     | 1.039    | 1.448              |

## 4. Natural Population Analysis Charges

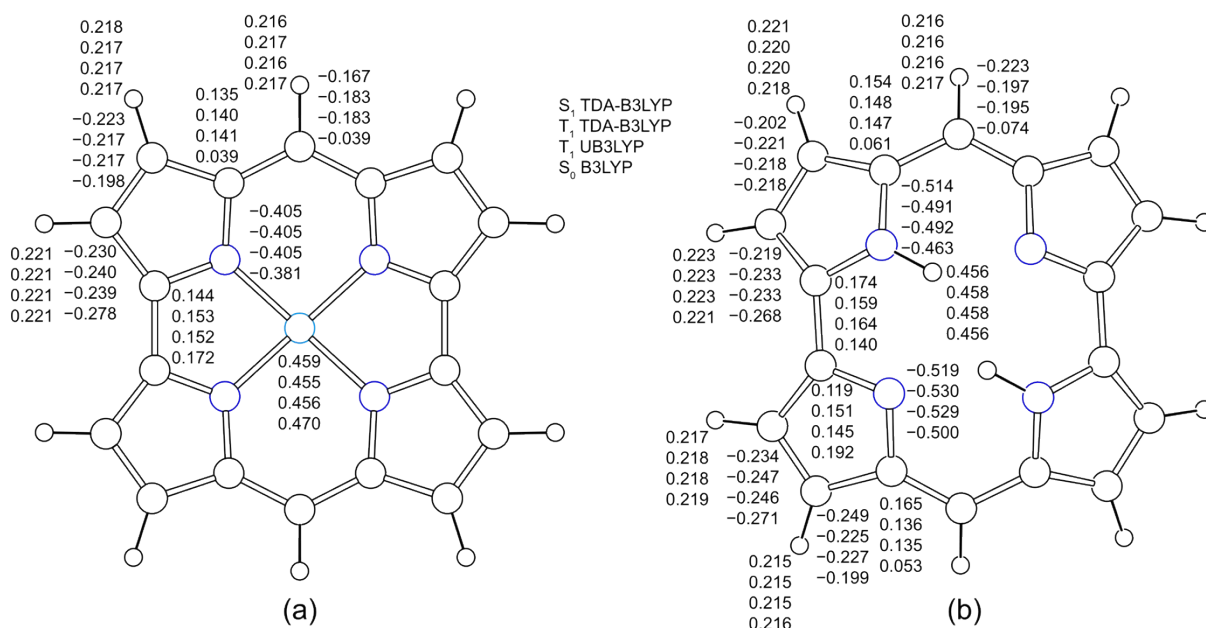

**Fig. S1** Symmetry unique natural population analysis (NPA) charges (in units of  $e$ ) at  $S_0$ ,  $T_1$  and  $S_1$  local minimum geometries of (a) NiNc and (b)  $H_2Nc$ , arranged in columns of four numbers each including, from bottom to top,  $S_0$  B3LYP,  $T_1$  UB3LYP,  $T_1$  TDA-B3LYP and  $S_1$  TDA-B3LYP results. (a) and (b) show the  $S_0$  B3LYP-D3(BJ) NiNc ( $C_{2v}$ ) and  $H_2Nc$  ( $C_2$ ) local minimum geometries, looking at the top of each bowl.

## 5. Cartesian Coordinates and Other Computational Data

The geometries at which NICS were calculated include the coordinates of the respective ghost atoms. All coordinates are given in Å.

UB3LYP-D3(BJ)/def2-TZVP total energy  $E$ ,  $\langle S^2 \rangle$  expectation value, lowest vibrational frequency  $\nu$  and optimized geometry of the  $T_1$  state of NiNc, bowl-shaped local minimum of  $C_{2v}$  symmetry.

$$E = -2419.767717 \text{ Ha}; \langle S^2 \rangle = 2.0071; \nu = 60.4 \text{ cm}^{-1} (A_1).$$

|   |           |           |           |
|---|-----------|-----------|-----------|
| N | -1.219094 | 1.327310  | 0.416560  |
| N | -1.219094 | -1.327310 | 0.416560  |
| N | 1.219094  | -1.327310 | 0.416560  |
| N | 1.219094  | 1.327310  | 0.416560  |
| C | -0.716720 | 2.571812  | 0.163128  |
| C | -1.826151 | 3.397186  | -0.227981 |
| C | -2.944929 | 2.593613  | -0.244976 |
| C | -2.534163 | 1.248024  | 0.121896  |
| C | -3.195626 | 0.000000  | 0.027753  |
| C | -2.534163 | -1.248024 | 0.121896  |
| C | -2.944929 | -2.593613 | -0.244976 |
| C | -1.826151 | -3.397186 | -0.227981 |
| C | -0.716720 | -2.571812 | 0.163128  |
| C | 0.716720  | -2.571812 | 0.163128  |

|    |           |           |           |
|----|-----------|-----------|-----------|
| C  | 1.826151  | -3.397186 | -0.227981 |
| C  | 2.944929  | -2.593613 | -0.244976 |
| C  | 2.534163  | -1.248024 | 0.121896  |
| C  | 3.195626  | 0.000000  | 0.027753  |
| C  | 2.534163  | 1.248024  | 0.121896  |
| C  | 2.944929  | 2.593613  | -0.244976 |
| C  | 1.826151  | 3.397186  | -0.227981 |
| C  | 0.716720  | 2.571812  | 0.163128  |
| H  | -1.783103 | 4.443885  | -0.481062 |
| H  | -3.945658 | 2.891856  | -0.514122 |
| H  | -3.945658 | -2.891856 | -0.514122 |
| H  | -1.783103 | -4.443885 | -0.481062 |
| H  | 1.783103  | -4.443885 | -0.481062 |
| H  | 3.945658  | -2.891856 | -0.514122 |
| H  | 3.945658  | 2.891856  | -0.514122 |
| H  | 1.783103  | 4.443885  | -0.481062 |
| Ni | 0.000000  | 0.000000  | 0.569127  |
| H  | 4.241224  | 0.000000  | -0.248345 |
| H  | -4.241224 | 0.000000  | -0.248345 |
| Bq | -1.783690 | 0.000000  | 0.278965  |
| Bq | -1.604568 | 0.000000  | -0.704861 |
| Bq | -1.962813 | 0.000000  | 1.262792  |
| Bq | -1.848211 | 2.227589  | 0.045725  |
| Bq | -1.661347 | 1.997198  | -0.909262 |
| Bq | -2.035076 | 2.457980  | 1.000713  |
| Bq | 0.000000  | 1.559649  | 0.345700  |
| Bq | 0.000000  | 1.398163  | -0.641175 |
| Bq | 0.000000  | 1.721134  | 1.332576  |

UB3LYP-D3(BJ)/def2-TZVP total energy  $E$ ,  $\langle S^2 \rangle$  expectation value, imaginary vibrational frequency  $\nu$  and optimized geometry of the  $T_1$  state of NiNc, planar TS of  $D_{2h}$  symmetry.

$E = -2419.765545$  Ha;  $\langle S^2 \rangle = 2.0082$ ;  $\nu = 44.5i$   $\text{cm}^{-1}$  ( $B_{3u}$ ).

|   |          |           |           |
|---|----------|-----------|-----------|
| N | 0.000000 | 1.318402  | 1.204796  |
| N | 0.000000 | -1.318402 | 1.204796  |
| N | 0.000000 | -1.318402 | -1.204796 |
| N | 0.000000 | 1.318402  | -1.204796 |
| C | 0.000000 | 2.592686  | 0.722096  |
| C | 0.000000 | 3.452301  | 1.877441  |
| C | 0.000000 | 2.642450  | 2.995264  |
| C | 0.000000 | 1.255114  | 2.548359  |
| C | 0.000000 | 0.000000  | 3.216379  |
| C | 0.000000 | -1.255114 | 2.548359  |
| C | 0.000000 | -2.642450 | 2.995264  |
| C | 0.000000 | -3.452301 | 1.877441  |
| C | 0.000000 | -2.592686 | 0.722096  |
| C | 0.000000 | -2.592686 | -0.722096 |
| C | 0.000000 | -3.452301 | -1.877441 |
| C | 0.000000 | -2.642450 | -2.995264 |
| C | 0.000000 | -1.255114 | -2.548359 |
| C | 0.000000 | 0.000000  | -3.216379 |
| C | 0.000000 | 1.255114  | -2.548359 |
| C | 0.000000 | 2.642450  | -2.995264 |
| C | 0.000000 | 3.452301  | -1.877441 |
| C | 0.000000 | 2.592686  | -0.722096 |
| H | 0.000000 | 4.530028  | 1.871529  |
| H | 0.000000 | 2.973337  | 4.021618  |

|    |          |           |           |
|----|----------|-----------|-----------|
| H  | 0.000000 | -2.973337 | 4.021618  |
| H  | 0.000000 | -4.530028 | 1.871529  |
| H  | 0.000000 | -4.530028 | -1.871529 |
| H  | 0.000000 | -2.973337 | -4.021618 |
| H  | 0.000000 | 2.973337  | -4.021618 |
| H  | 0.000000 | 4.530028  | -1.871529 |
| Ni | 0.000000 | 0.000000  | 0.000000  |
| H  | 0.000000 | -0.000000 | -4.297776 |
| H  | 0.000000 | -0.000000 | 4.297776  |

TDA-B3LYP-D3(BJ)/def2-TZVP total energy  $E$ , lowest vibrational frequency  $\nu$  and optimized geometry of the  $T_1$  state of NiNc, bowl-shaped local minimum of  $C_{2v}$  symmetry.

$E = -2419.769026$  Ha;  $\nu = 60.4$  cm<sup>-1</sup> ( $A_1$ ).

|    |           |           |           |
|----|-----------|-----------|-----------|
| N  | 1.327376  | 1.219130  | 0.307388  |
| N  | -1.327376 | 1.219130  | 0.307388  |
| N  | -1.327376 | -1.219130 | 0.307388  |
| N  | 1.327376  | -1.219130 | 0.307388  |
| C  | 2.571529  | 0.717150  | 0.053978  |
| C  | 3.396996  | 1.826857  | -0.336619 |
| C  | 2.593254  | 2.945546  | -0.353282 |
| C  | 1.247909  | 2.534691  | 0.013223  |
| C  | 0.000000  | 3.195618  | -0.080998 |
| C  | -1.247909 | 2.534691  | 0.013223  |
| C  | -2.593254 | 2.945546  | -0.353282 |
| C  | -3.396996 | 1.826857  | -0.336619 |
| C  | -2.571529 | 0.717150  | 0.053978  |
| C  | -2.571529 | -0.717150 | 0.053978  |
| C  | -3.396996 | -1.826857 | -0.336619 |
| C  | -2.593254 | -2.945546 | -0.353282 |
| C  | -1.247909 | -2.534691 | 0.013223  |
| C  | -0.000000 | -3.195618 | -0.080998 |
| C  | 1.247909  | -2.534691 | 0.013223  |
| C  | 2.593254  | -2.945546 | -0.353282 |
| C  | 3.396996  | -1.826857 | -0.336619 |
| C  | 2.571529  | -0.717150 | 0.053978  |
| H  | 4.443710  | 1.783986  | -0.589621 |
| H  | 2.891513  | 3.946377  | -0.622036 |
| H  | -2.891513 | 3.946377  | -0.622036 |
| H  | -4.443710 | 1.783986  | -0.589621 |
| H  | -4.443710 | -1.783986 | -0.589621 |
| H  | -2.891513 | -3.946377 | -0.622036 |
| H  | 2.891513  | -3.946377 | -0.622036 |
| H  | 4.443710  | -1.783986 | -0.589621 |
| Ni | 0.000000  | 0.000000  | 0.459641  |
| H  | 0.000000  | -4.241213 | -0.356710 |
| H  | 0.000000  | 4.241213  | -0.356710 |

TDA-B3LYP-D3(BJ)/def2-TZVP total energy  $E$ , imaginary vibrational frequency  $\nu$  and optimized geometry of the  $T_1$  state of NiNc, planar TS of  $D_{2h}$  symmetry.

$E = -2419.766861$  Ha;  $\nu = 44.5i$  cm<sup>-1</sup> ( $B_{3u}$ ).

|   |          |           |           |
|---|----------|-----------|-----------|
| N | 0.000000 | 1.318491  | 1.204866  |
| N | 0.000000 | -1.318491 | 1.204866  |
| N | 0.000000 | -1.318491 | -1.204866 |

|    |          |           |           |
|----|----------|-----------|-----------|
| N  | 0.000000 | 1.318491  | -1.204866 |
| C  | 0.000000 | 2.592344  | 0.722541  |
| C  | 0.000000 | 3.452002  | 1.878122  |
| C  | 0.000000 | 2.641960  | 2.995758  |
| C  | 0.000000 | 1.254942  | 2.548843  |
| C  | 0.000000 | 0.000000  | 3.216337  |
| C  | 0.000000 | -1.254942 | 2.548843  |
| C  | 0.000000 | -2.641960 | 2.995758  |
| C  | 0.000000 | -3.452002 | 1.878122  |
| C  | 0.000000 | -2.592344 | 0.722541  |
| C  | 0.000000 | -2.592344 | -0.722541 |
| C  | 0.000000 | -3.452002 | -1.878122 |
| C  | 0.000000 | -2.641960 | -2.995758 |
| C  | 0.000000 | -1.254942 | -2.548843 |
| C  | 0.000000 | 0.000000  | -3.216337 |
| C  | 0.000000 | 1.254942  | -2.548843 |
| C  | 0.000000 | 2.641960  | -2.995758 |
| C  | 0.000000 | 3.452002  | -1.878122 |
| C  | 0.000000 | 2.592344  | -0.722541 |
| H  | 0.000000 | 4.529719  | 1.872328  |
| H  | 0.000000 | 2.972776  | 4.022135  |
| H  | 0.000000 | -2.972776 | 4.022135  |
| H  | 0.000000 | -4.529719 | 1.872328  |
| H  | 0.000000 | -4.529719 | -1.872328 |
| H  | 0.000000 | -2.972776 | -4.022135 |
| H  | 0.000000 | 2.972776  | -4.022135 |
| H  | 0.000000 | 4.529719  | -1.872328 |
| Ni | 0.000000 | 0.000000  | 0.000000  |
| H  | 0.000000 | -0.000000 | -4.297628 |
| H  | 0.000000 | -0.000000 | 4.297628  |

TDA-B3LYP-D3(BJ)/def2-TZVP total energy  $E$ , lowest vibrational frequency  $\nu$  and optimized geometry of the  $S_1$  state of NiNc, bowl-shaped local minimum of  $C_{2v}$  symmetry.

$E = -2419.756198$  Ha;  $\nu = 64.0$  cm<sup>-1</sup> ( $A_1$ ).

|   |           |           |           |
|---|-----------|-----------|-----------|
| N | 1.328231  | 1.220775  | 0.327247  |
| N | -1.328231 | 1.220775  | 0.327247  |
| N | -1.328231 | -1.220775 | 0.327247  |
| N | 1.328231  | -1.220775 | 0.327247  |
| C | 2.566108  | 0.712478  | 0.058457  |
| C | 3.389384  | 1.820789  | -0.356385 |
| C | 2.587055  | 2.938884  | -0.376055 |
| C | 1.248678  | 2.533888  | 0.013112  |
| C | 0.000000  | 3.193762  | -0.088061 |
| C | -1.248678 | 2.533888  | 0.013112  |
| C | -2.587055 | 2.938884  | -0.376055 |
| C | -3.389384 | 1.820789  | -0.356385 |
| C | -2.566108 | 0.712478  | 0.058457  |
| C | -2.566108 | -0.712478 | 0.058457  |
| C | -3.389384 | -1.820789 | -0.356385 |
| C | -2.587055 | -2.938884 | -0.376055 |
| C | -1.248678 | -2.533888 | 0.013112  |
| C | -0.000000 | -3.193762 | -0.088061 |
| C | 1.248678  | -2.533888 | 0.013112  |
| C | 2.587055  | -2.938884 | -0.376055 |
| C | 3.389384  | -1.820789 | -0.356385 |
| C | 2.566108  | -0.712478 | 0.058457  |

|    |           |           |           |
|----|-----------|-----------|-----------|
| H  | 4.432304  | 1.773013  | -0.624089 |
| H  | 2.882163  | 3.936130  | -0.661197 |
| H  | -2.882163 | 3.936130  | -0.661197 |
| H  | -4.432304 | 1.773013  | -0.624089 |
| H  | -4.432304 | -1.773013 | -0.624089 |
| H  | -2.882163 | -3.936130 | -0.661197 |
| H  | 2.882163  | -3.936130 | -0.661197 |
| H  | 4.432304  | -1.773013 | -0.624089 |
| Ni | 0.000000  | 0.000000  | 0.487769  |
| H  | 0.000000  | -4.234815 | -0.380832 |
| H  | 0.000000  | 4.234815  | -0.380832 |

TDAB3LYP-D3(BJ)/def2-TZVP total energy  $E$ , imaginary vibrational frequency  $\nu$  and optimized geometry of the  $S_1$  state of NiNc, planar TS of  $D_{2h}$  symmetry.

$E = -2419.766861$  Ha;  $\nu = 47.4i$   $\text{cm}^{-1}$  ( $B_{3u}$ ).

|    |          |           |           |
|----|----------|-----------|-----------|
| N  | 0.000000 | 1.318154  | 1.204446  |
| N  | 0.000000 | -1.318154 | 1.204446  |
| N  | 0.000000 | -1.318154 | -1.204446 |
| N  | 0.000000 | 1.318154  | -1.204446 |
| C  | 0.000000 | 2.589692  | 0.718236  |
| C  | 0.000000 | 3.451156  | 1.878953  |
| C  | 0.000000 | 2.642114  | 2.995971  |
| C  | 0.000000 | 1.256715  | 2.549829  |
| C  | 0.000000 | 0.000000  | 3.217392  |
| C  | 0.000000 | -1.256715 | 2.549829  |
| C  | 0.000000 | -2.642114 | 2.995971  |
| C  | 0.000000 | -3.451156 | 1.878953  |
| C  | 0.000000 | -2.589692 | 0.718236  |
| C  | 0.000000 | -2.589692 | -0.718236 |
| C  | 0.000000 | -3.451156 | -1.878953 |
| C  | 0.000000 | -2.642114 | -2.995971 |
| C  | 0.000000 | -1.256715 | -2.549829 |
| C  | 0.000000 | 0.000000  | -3.217392 |
| C  | 0.000000 | 1.256715  | -2.549829 |
| C  | 0.000000 | 2.642114  | -2.995971 |
| C  | 0.000000 | 3.451156  | -1.878953 |
| C  | 0.000000 | 2.589692  | -0.718236 |
| H  | 0.000000 | 4.528972  | 1.873171  |
| H  | 0.000000 | 2.973747  | 4.022102  |
| H  | 0.000000 | -2.973747 | 4.022102  |
| H  | 0.000000 | -4.528972 | 1.873171  |
| H  | 0.000000 | -4.528972 | -1.873171 |
| H  | 0.000000 | -2.973747 | -4.022102 |
| H  | 0.000000 | 2.973747  | -4.022102 |
| H  | 0.000000 | 4.528972  | -1.873171 |
| Ni | 0.000000 | 0.000000  | 0.000000  |
| H  | 0.000000 | -0.000000 | -4.298777 |
| H  | 0.000000 | -0.000000 | 4.298777  |

UB3LYP-D3(BJ)/def2-TZVP total energy  $E$ ,  $\langle S^2 \rangle$  expectation value, lowest vibrational frequency  $\nu$  and optimized geometry of the  $T_1$  state of  $H_2Nc$ , bowl-shaped local minimum of  $C_2$  symmetry.

$E = -912.467305$  Ha;  $\langle S^2 \rangle = 2.0053$ ;  $\nu = 80.9$   $\text{cm}^{-1}$  (A).

|    |           |           |           |
|----|-----------|-----------|-----------|
| N  | 1.213975  | 1.263100  | 0.579918  |
| N  | -1.335866 | 1.316304  | 0.621991  |
| N  | -1.213975 | -1.263100 | 0.579918  |
| N  | 1.335866  | -1.316304 | 0.621991  |
| C  | 2.419105  | 0.741377  | 0.258109  |
| C  | 3.265849  | 1.783777  | -0.281660 |
| C  | 2.501653  | 2.917790  | -0.321734 |
| C  | 1.179294  | 2.554943  | 0.178639  |
| C  | -0.047179 | 3.252014  | 0.052003  |
| C  | -1.290748 | 2.599235  | 0.180095  |
| C  | -2.607051 | 2.868297  | -0.336520 |
| C  | -3.328331 | 1.688949  | -0.294357 |
| C  | -2.483420 | 0.678984  | 0.263046  |
| C  | -2.419105 | -0.741377 | 0.258109  |
| C  | -3.265849 | -1.783777 | -0.281660 |
| C  | -2.501653 | -2.917790 | -0.321734 |
| C  | -1.179294 | -2.554943 | 0.178639  |
| C  | 0.047179  | -3.252014 | 0.052003  |
| C  | 1.290748  | -2.599235 | 0.180095  |
| C  | 2.607051  | -2.868297 | -0.336520 |
| C  | 3.328331  | -1.688949 | -0.294357 |
| C  | 2.483420  | -0.678984 | 0.263046  |
| H  | 4.284026  | 1.671685  | -0.618411 |
| H  | 2.793785  | 3.885783  | -0.698172 |
| H  | -2.938706 | 3.810673  | -0.740808 |
| H  | -4.330869 | 1.536120  | -0.657928 |
| H  | -4.284026 | -1.671685 | -0.618411 |
| H  | -2.793785 | -3.885783 | -0.698172 |
| H  | 2.938706  | -3.810673 | -0.740808 |
| H  | 4.330869  | -1.536120 | -0.657928 |
| H  | 0.033983  | -4.262774 | -0.331164 |
| H  | -0.033983 | 4.262774  | -0.331164 |
| H  | 0.445534  | -0.857975 | 0.835538  |
| H  | -0.445534 | 0.857975  | 0.835538  |
| Bq | 2.115975  | 1.852197  | 0.082654  |
| Bq | 1.806861  | 1.603621  | -0.835310 |
| Bq | 2.425089  | 2.100773  | 1.000619  |
| Bq | 1.242061  | 0.001531  | 0.565690  |
| Bq | 1.022487  | -0.045432 | -0.408775 |
| Bq | 1.461635  | 0.048495  | 1.540155  |
| Bq | 2.209083  | -1.830354 | 0.086851  |
| Bq | 1.861888  | -1.578476 | -0.816483 |
| Bq | 2.556279  | -2.082232 | 0.990185  |
| Bq | 0.121010  | -1.973928 | 0.408031  |
| Bq | 0.138869  | -1.667275 | -0.543623 |
| Bq | 0.103150  | -2.280582 | 1.359684  |

UB3LYP-D3(BJ)/def2-TZVP total energy  $E$ ,  $\langle S^2 \rangle$  expectation value, imaginary vibrational frequency  $\nu$  and optimized geometry of the  $T_1$  state of  $H_2Nc$ , TS of  $C_i$  symmetry.

$E = -912.462284$  Ha;  $\langle S^2 \rangle = 2.0058$ ;  $\nu = 48.0i$   $cm^{-1}$  ( $A_u$ ).

|   |           |           |           |
|---|-----------|-----------|-----------|
| N | 0.003648  | 1.187209  | 1.211260  |
| N | 0.285122  | -1.294875 | 1.263554  |
| N | -0.003648 | -1.187209 | -1.211260 |
| N | -0.285122 | 1.294875  | -1.263554 |
| C | -0.051397 | 2.450019  | 0.741208  |
| C | -0.041901 | 3.360216  | 1.867267  |



|   |           |           |           |
|---|-----------|-----------|-----------|
| C | 0.000529  | 2.582862  | 2.997551  |
| C | 0.034213  | 1.188785  | 2.559525  |
| C | 0.076670  | -0.039756 | 3.274286  |
| C | 0.135417  | -1.287309 | 2.605361  |
| C | -0.034532 | -2.677740 | 2.955819  |
| C | -0.038262 | -3.418580 | 1.783995  |
| C | 0.130409  | -2.510685 | 0.687734  |
| C | 0.051397  | -2.450019 | -0.741208 |
| C | 0.041901  | -3.360216 | -1.867267 |
| C | -0.000529 | -2.582862 | -2.997551 |
| C | -0.034213 | -1.188785 | -2.559525 |
| C | -0.076670 | 0.039756  | -3.274286 |
| C | -0.135417 | 1.287309  | -2.605361 |
| C | 0.034532  | 2.677740  | -2.955819 |
| C | 0.038262  | 3.418580  | -1.783995 |
| C | -0.130409 | 2.510685  | -0.687734 |
| H | -0.084197 | 4.436905  | 1.825075  |
| H | 0.008984  | 2.931589  | 4.018694  |
| H | -0.169088 | -3.062461 | 3.953589  |
| H | -0.175934 | -4.484097 | 1.704111  |
| H | 0.084197  | -4.436905 | -1.825075 |
| H | -0.008984 | -2.931589 | -4.018694 |
| H | 0.169088  | 3.062461  | -3.953589 |
| H | 0.175934  | 4.484097  | -1.704111 |
| H | -0.023488 | 0.025491  | -4.353693 |
| H | 0.023488  | -0.025491 | 4.353693  |
| H | -0.312598 | 0.395511  | -0.775706 |
| H | 0.312598  | -0.395511 | 0.775706  |

TDA-B3LYP-D3(BJ)/def2-TZVP total energy  $E$ , lowest vibrational frequency  $\nu$  and optimized geometry of the  $T_1$  state of  $H_2Nc$ , bowl-shaped local minimum of  $C_2$  symmetry.

$E = -912.468873$  Ha;  $\nu = 81.0$   $cm^{-1}$  (A).

|   |           |           |           |
|---|-----------|-----------|-----------|
| N | -1.236630 | 1.241170  | -0.521509 |
| N | 1.312357  | 1.339751  | -0.561370 |
| N | 1.236630  | -1.241170 | -0.521509 |
| N | -1.312357 | -1.339751 | -0.561370 |
| C | -2.430704 | 0.699240  | -0.198618 |
| C | -3.297033 | 1.728262  | 0.339849  |
| C | -2.554054 | 2.875083  | 0.378158  |
| C | -1.223970 | 2.535263  | -0.120887 |
| C | -0.012487 | 3.252625  | 0.006588  |
| C | 1.244559  | 2.621008  | -0.119539 |
| C | 2.554054  | 2.913501  | 0.398136  |
| C | 3.297343  | 1.746538  | 0.355422  |
| C | 2.472018  | 0.722891  | -0.203263 |
| C | 2.430704  | -0.699240 | -0.198618 |
| C | 3.297033  | -1.728262 | 0.339849  |
| C | 2.554054  | -2.875083 | 0.378158  |
| C | 1.223970  | -2.535263 | -0.120887 |
| C | 0.012487  | -3.252625 | 0.006588  |
| C | -1.244559 | -2.621008 | -0.119539 |
| C | -2.554054 | -2.913501 | 0.398136  |
| C | -3.297343 | -1.746538 | 0.355422  |
| C | -2.472018 | -0.722891 | -0.203263 |
| H | -4.313033 | 1.597984  | 0.676634  |
| H | -2.863476 | 3.838298  | 0.753028  |

|   |           |           |           |
|---|-----------|-----------|-----------|
| H | 2.868344  | 3.861245  | 0.803665  |
| H | 4.302305  | 1.612065  | 0.719550  |
| H | 4.313033  | -1.597984 | 0.676634  |
| H | 2.863476  | -3.838298 | 0.753028  |
| H | -2.868344 | -3.861245 | 0.803665  |
| H | -4.302305 | -1.612065 | 0.719550  |
| H | 0.043524  | -4.263271 | 0.388657  |
| H | -0.043524 | 4.263271  | 0.388657  |
| H | -0.431226 | -0.865355 | -0.776461 |
| H | 0.431226  | 0.865355  | -0.776461 |

TDA-B3LYP-D3(BJ)/def2-TZVP total energy  $E$ , imaginary vibrational frequency  $\nu$  and optimized geometry of the  $T_1$  state of  $H_2Nc$ , TS of  $C_i$  symmetry.

$$E = -912.463883 \text{ Ha}; \nu = 47.7i \text{ cm}^{-1} (A_u).$$

|   |           |           |           |
|---|-----------|-----------|-----------|
| N | 0.007408  | 1.187788  | 1.210812  |
| N | 0.284361  | -1.295178 | 1.263524  |
| N | -0.007408 | -1.187788 | -1.210812 |
| N | -0.284361 | 1.295178  | -1.263524 |
| C | -0.050027 | 2.449297  | 0.741893  |
| C | -0.043198 | 3.359976  | 1.869213  |
| C | -0.000352 | 2.582983  | 2.998682  |
| C | 0.036119  | 1.188253  | 2.560547  |
| C | 0.078491  | -0.038105 | 3.274214  |
| C | 0.135388  | -1.287434 | 2.605098  |
| C | -0.035164 | -2.676492 | 2.956168  |
| C | -0.039259 | -3.418402 | 1.783886  |
| C | 0.129748  | -2.511567 | 0.688143  |
| C | 0.050027  | -2.449297 | -0.741893 |
| C | 0.043198  | -3.359976 | -1.869213 |
| C | 0.000352  | -2.582983 | -2.998682 |
| C | -0.036119 | -1.188253 | -2.560547 |
| C | -0.078491 | 0.038105  | -3.274214 |
| C | -0.135388 | 1.287434  | -2.605098 |
| C | 0.035164  | 2.676492  | -2.956168 |
| C | 0.039259  | 3.418402  | -1.783886 |
| C | -0.129748 | 2.511567  | -0.688143 |
| H | -0.087547 | 4.436579  | 1.826922  |
| H | 0.006279  | 2.931386  | 4.019944  |
| H | -0.169691 | -3.060873 | 3.954051  |
| H | -0.177617 | -4.483879 | 1.704762  |
| H | 0.087547  | -4.436579 | -1.826922 |
| H | -0.006279 | -2.931386 | -4.019944 |
| H | 0.169691  | 3.060873  | -3.954051 |
| H | 0.177617  | 4.483879  | -1.704762 |
| H | -0.026954 | 0.023898  | -4.353571 |
| H | 0.026954  | -0.023898 | 4.353571  |
| H | -0.313499 | 0.396446  | -0.775129 |
| H | 0.313499  | -0.396446 | 0.775129  |

TDA-B3LYP-D3(BJ)/def2-TZVP total energy  $E$ , lowest vibrational frequency  $\nu$  and optimized geometry of the  $S_1$  state of  $H_2Nc$ , bowl-shaped local minimum of  $C_2$  symmetry.

$$E = -912.457951 \text{ Ha}; \nu = 85.5 \text{ cm}^{-1} (A).$$

|   |           |          |           |
|---|-----------|----------|-----------|
| N | -1.246011 | 1.256065 | -0.562942 |
|---|-----------|----------|-----------|

|   |           |           |           |
|---|-----------|-----------|-----------|
| N | 1.315694  | 1.348056  | -0.625646 |
| N | 1.246011  | -1.256065 | -0.562942 |
| N | -1.315694 | -1.348056 | -0.625646 |
| C | -2.439514 | 0.684711  | -0.213395 |
| C | -3.286906 | 1.691528  | 0.386972  |
| C | -2.542644 | 2.837504  | 0.444495  |
| C | -1.232198 | 2.516978  | -0.113101 |
| C | -0.000184 | 3.247011  | 0.013429  |
| C | 1.232198  | 2.620431  | -0.138384 |
| C | 2.547569  | 2.902652  | 0.404681  |
| C | 3.280771  | 1.744971  | 0.364044  |
| C | 2.458510  | 0.717264  | -0.226852 |
| C | 2.439514  | -0.684711 | -0.213395 |
| C | 3.286906  | -1.691528 | 0.386972  |
| C | 2.542644  | -2.837504 | 0.444495  |
| C | 1.232198  | -2.516978 | -0.113101 |
| C | 0.000184  | -3.247011 | 0.013429  |
| C | -1.232198 | -2.620431 | -0.138384 |
| C | -2.547569 | -2.902652 | 0.404681  |
| C | -3.280771 | -1.744971 | 0.364044  |
| C | -2.458510 | -0.717264 | -0.226852 |
| H | -4.291042 | 1.547371  | 0.752549  |
| H | -2.837443 | 3.784686  | 0.868468  |
| H | 2.853891  | 3.844933  | 0.829310  |
| H | 4.276660  | 1.599425  | 0.748909  |
| H | 4.291042  | -1.547371 | 0.752549  |
| H | 2.837443  | -3.784686 | 0.868468  |
| H | -2.853891 | -3.844933 | 0.829310  |
| H | -4.276660 | -1.599425 | 0.748909  |
| H | 0.028681  | -4.243283 | 0.430979  |
| H | -0.028681 | 4.243283  | 0.430979  |
| H | -0.436326 | -0.874213 | -0.841434 |
| H | 0.436326  | 0.874213  | -0.841434 |

TDAB3LYP-D3(BJ)/def2-TZVP total energy  $E$ , imaginary vibrational frequency  $\nu$  and optimized geometry of the  $S_1$  state of NiNc, TS of  $C_i$  symmetry.

$E = -912.450687$  Ha;  $\nu = 47.1i$  cm<sup>-1</sup> ( $A_u$ ).

|   |           |           |           |
|---|-----------|-----------|-----------|
| N | -0.059699 | 1.181339  | 1.217849  |
| N | 0.351303  | -1.290515 | 1.261968  |
| N | 0.059699  | -1.181339 | -1.217849 |
| N | -0.351303 | 1.290515  | -1.261968 |
| C | -0.087785 | 2.454012  | 0.733594  |
| C | -0.030038 | 3.362087  | 1.855436  |
| C | 0.018380  | 2.584199  | 2.989275  |
| C | 0.009456  | 1.195164  | 2.552534  |
| C | 0.053980  | -0.057022 | 3.274590  |
| C | 0.153450  | -1.279588 | 2.606611  |
| C | -0.032581 | -2.679386 | 2.948738  |
| C | -0.023599 | -3.412227 | 1.785278  |
| C | 0.171919  | -2.497507 | 0.678807  |
| C | 0.087785  | -2.454012 | -0.733594 |
| C | 0.030038  | -3.362087 | -1.855436 |
| C | -0.018380 | -2.584199 | -2.989275 |
| C | -0.009456 | -1.195164 | -2.552534 |
| C | -0.053980 | 0.057022  | -3.274590 |
| C | -0.153450 | 1.279588  | -2.606611 |

|   |           |           |           |
|---|-----------|-----------|-----------|
| C | 0.032581  | 2.679386  | -2.948738 |
| C | 0.023599  | 3.412227  | -1.785278 |
| C | -0.171919 | 2.497507  | -0.678807 |
| H | -0.043577 | 4.439685  | 1.813971  |
| H | 0.062327  | 2.935440  | 4.008585  |
| H | -0.192416 | -3.063214 | 3.943384  |
| H | -0.172071 | -4.475925 | 1.698598  |
| H | 0.043577  | -4.439685 | -1.813971 |
| H | -0.062327 | -2.935440 | -4.008585 |
| H | 0.192416  | 3.063214  | -3.943384 |
| H | 0.172071  | 4.475925  | -1.698598 |
| H | 0.036452  | 0.048371  | -4.351459 |
| H | -0.036452 | -0.048371 | 4.351459  |
| H | -0.356619 | 0.395340  | -0.770690 |
| H | 0.356619  | -0.395340 | 0.770690  |
